# Supplementary material for: A Recurrent Germline Mutation in the 5’UTR of the Androgen Receptor Causes Complete Androgen Insensitivity by Activating Aberrant uORF Translation
Source: PubMed Central journal article supplement (PMC4844194; doi:10.1371/journal.pone.0154158), 2016-04-25
Supplement: pone.0154158.s001.pdf [file pone.0154158.s001.pdf]

|                                        |                            |
|----------------------------------------|----------------------------|
| Kozak consensus sequence               | <b>A/G C C A T G G C/A</b> |
| wt - uORF Kozak sequence               | <b>G C C A C G A C</b>     |
| mut - uORF Kozak sequence              | <b>G C C A T G A C</b>     |
| pORF Kozak sequence                    | <b>A G G A T G G A</b>     |
| Downstream ORF Kozak sequence (aa 191) | <b>A C C A T G C A</b>     |
