# Supplementary material for: A Recurrent Germline Mutation in the 5’UTR of the Androgen Receptor Causes Complete Androgen Insensitivity by Activating Aberrant uORF Translation
Source: PubMed Central journal article supplement (PMC4844194; doi:10.1371/journal.pone.0154158), 2016-04-25

AR5'UTR

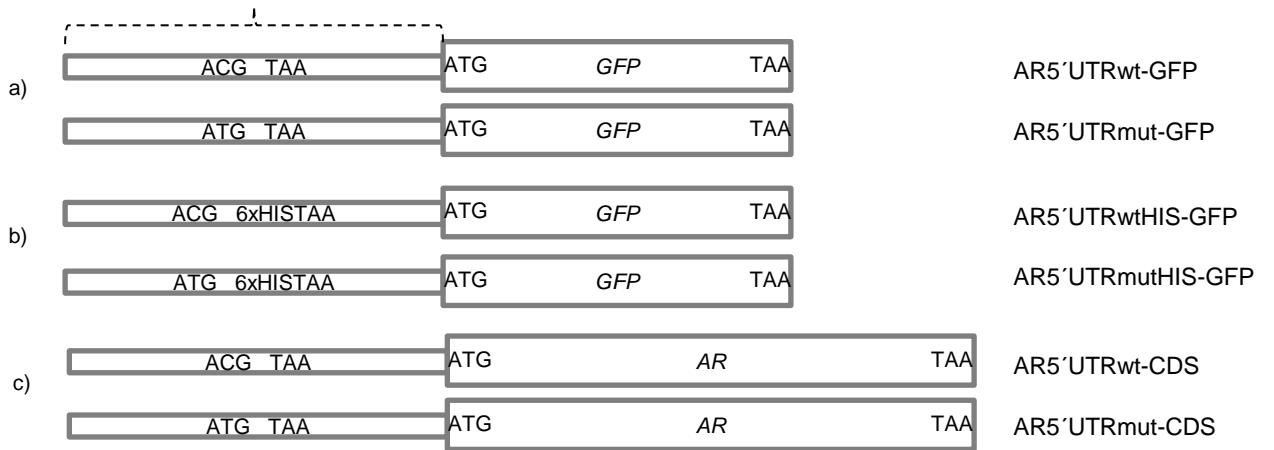

Supplement: pone.0154158.s003.pdf [file pone.0154158.s003.pdf]
