# Supplementary material for: A Recurrent Germline Mutation in the 5’UTR of the Androgen Receptor Causes Complete Androgen Insensitivity by Activating Aberrant uORF Translation
Source: PubMed Central journal article supplement (PMC4844194; doi:10.1371/journal.pone.0154158), 2016-04-25
Supplement: pone.0154158.s006.pdf [file pone.0154158.s006.pdf]

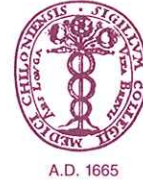

28. MÄR. 2011 *Eing*

Universitäts-Kinderklinik · Schwanenweg 20 · 24105 Kiel

Prof. Dr. med. P.-M. Holterhus  
Klinik für Allgemeine Pädiatrie  
Endokrinologische Ambulanz  
UKSH, Campus Kiel  
Arnold-Heller-Str. 3, Haus 9  
24105 Kiel

Schwanenweg 20  
D-24105 Kiel

Telefon 04 31 / 597-18 09  
Telefax 04 31 / 597-18 31

Datum:

16.03.2011

**AZ.: D 415/11**  
**Studienplan:**

(bitte stets angeben)

**Androgenresistenz ohne Androgenrezeptorgenmutation:  
von der funktionellen Charakterisierung zum Epigenotyp**  
(in Bezug auf AZ. A 410/08: Investigation of the molecular patho-  
genesis and patho- physiology of Disorders of Sex Development  
(DSD) –EuroDSD)  
DFG-Sachbeihilfeantrag

**Ihr Schreiben**  
**vom:**

**04.03.2011 (Eingang 07.03.2011)**

Lieber Herr Holterhus,

vielen Dank für Ihren obengenannten Antrag zur Beratung gemäß § 15 Berufsord-  
nung (BO) der Ärztekammer Schleswig-Holstein.

Nach Durchsicht der Unterlagen durch die Geschäftsstelle und durch mich als  
Vorsitzenden der Ethik-Kommission bestehen gegen die Durchführung des Projektes  
keine berufsethischen und berufsrechtlichen Bedenken.

Mit freundlichen kollegialen Grüßen

  
Prof. Dr. med. H. M. Mehdorn  
Vorsitzender der Ethik-Kommission

  
Dr. med. Christine Glinicke  
Geschäftsführung der Ethik-Kommission
