# Supplementary material for: A Recurrent Germline Mutation in the 5’UTR of the Androgen Receptor Causes Complete Androgen Insensitivity by Activating Aberrant uORF Translation
Source: PubMed Central journal article supplement (PMC4844194; doi:10.1371/journal.pone.0154158), 2016-04-25
Supplement: pone.0154158.s007.pdf [file pone.0154158.s007.pdf]

|                         |                                               |
|-------------------------|-----------------------------------------------|
| Primer used for cloning |                                               |
| TSSAS1                  | 5'CGGAATTCTCTCTAGTTAGCCAGAGAGC3'              |
| BGHS1                   | 5'CGGAATTCATAGGATCCTTTCTAATAAAATGAGGAAATTGC3' |
| GFP-S1                  | 5'CATGCCATGGTGAGCAAGGGCGAGG3'                 |
| GFP-AS1                 | 5'GCGGATCCTTACTTGTACAGCTCGTCC3'               |
| AR5'UTR-S1              | 5'CGGAATTCCGAGATCCCGGGGAGCCAG3'               |
| AR5'UTR-AS1             | 5'CAGATGCATGGATCCGAGATCCCGGGGAG3'             |
| Nsil-BamHI-AR5'UTR-S    | 5'TTCCTCATCCAGGACCAGGTAGCCTGT3'               |
| SexAI-AR-AS             | 5'CATGCCATGGTTGAGCTTGGCTGAATCTTCC3'           |
| AR5UTR-HIS-S            | 5'CACCACCACCACCACCACTAATAACTCAGTTCTTATTTGC3'  |
| AR5UTR-HIS-AS           | 5'GTGGTGGTGGTGGTGGTGTCTTTTTCTTTATTTGCGC3'     |
| Primer used for qPCR    |                                               |
| GFP fw                  | 5'AAGCTGACCCTGAAGTTCATCTGC3'                  |
| GFP rev                 | 5'CTTGTAGTTGCCGTCGTCCTTGAA3'                  |
| ARseq4-up               | 5'GAGGCGACAGAGGGAAAAAG3'                      |
| ARseq4-do               | 5'TTGGAAGGTGGAGGATTTT3'                       |
| ARseq4a-up              | 5'AGCTGCACATTGCAAAGAAG3'                      |
| ARseq4a-do              | 5'GAAAAGGCAGTCAGGTCTTCA3'                     |
